# Supplementary material
Source: MDPI journal article supplement (https://www.mdpi.com/1424-8247/11/3/75)
Supplement: s1 [file s1]

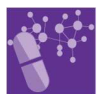

# Polyethylene Glycol Exposure with Antihemophilic Factor (Recombinant), PEGylated (rurioctocog alfa pegol) and Other Therapies Indicated for the Pediatric Population: History and Safety

Reinhard Stidl <sup>1</sup>, Michael Denne <sup>2</sup>, Jimena Goldstine <sup>2</sup>, Bill Kadish <sup>3</sup>, Katherine I. Korakas <sup>3</sup> and Peter L. Turecek <sup>\*</sup>

Supplemental Table S1. Factor VIII and IX Therapy Adverse Events

| Drug Name                                                             | Adverse Events Listed in PI                                                                                                                                                                                                               | Post-Marketing-reported Adverse Events                                                                                                                                        |
|-----------------------------------------------------------------------|-------------------------------------------------------------------------------------------------------------------------------------------------------------------------------------------------------------------------------------------|-------------------------------------------------------------------------------------------------------------------------------------------------------------------------------|
| <b>Factor VIII Therapies</b>                                          |                                                                                                                                                                                                                                           |                                                                                                                                                                               |
| Rurioctocog alfa pegol (Shire)                                        | Headache, nausea, diarrhea, hypersensitivity, headache, rash, flushing                                                                                                                                                                    | NA                                                                                                                                                                            |
| Antihemophilic factor (recombinant) (Shire)                           | Pyrexia, headache, cough, nasopharyngitis, vomiting, arthralgia, limb injury, upper respiratory tract infection, pharyngolaryngeal pain, nasal congestion, diarrhea, nausea, pain, rash, ear infection, procedural pain, rhinorrhea       | Anaphylaxis, immune system hypersensitivity, FVIII inhibition, injection-site reaction, chills, fatigue/malaise, chest discomfort/pain, less-than-expected therapeutic effect |
| Antihemophilic factor/von Willebrand factor complex [human] (Grifols) | Pruritus, headache, back pain, paresthesia, respiratory distress, facial edema, pain, rash, chills, pulmonary embolism, hemorrhage, hematocrit decrease, orthostatic hypotension                                                          | Paresthesia, respiratory distress, facial edema, pain, rash, and chills                                                                                                       |
| Antihemophilic actor (recombinant), formulated with Sucrose (Bayer)   | Inhibitor formation, skin-associated hypersensitivity reactions, infusion site reactions, central venous access device associated infections, systemic hypersensitivity reactions (bronchospastic reactions, hypotension and anaphylaxis) | Dysgeusia                                                                                                                                                                     |

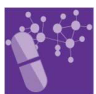

|                                                                       |                                                                                                                                                                                                                                                                         |                                                                                                                                                                                                                                                                                                                                                                                            |
|-----------------------------------------------------------------------|-------------------------------------------------------------------------------------------------------------------------------------------------------------------------------------------------------------------------------------------------------------------------|--------------------------------------------------------------------------------------------------------------------------------------------------------------------------------------------------------------------------------------------------------------------------------------------------------------------------------------------------------------------------------------------|
| Antihemophilic factor (human), Method M, monoclonal purified (Baxter) | Factor VIII inhibition, dizziness, headache, dysgeusia, pyrexia, infusion site inflammation, chest tightness, fuzziness                                                                                                                                                 | Anaphylactic reaction, hypersensitivity, visual impairment, ocular hyperemia, cyanosis, bradycardia, tachycardia, hypotension, flushing, bronchospasm, dyspnea, cough, hyperventilation, diarrhea, vomiting, nausea, abdominal pain, urticaria, rash, pruritus, hyperhidrosis, inhibitor development, musculoskeletal pain, facial edema, edema, chills, fatigue, chest pain, irritability |
| Antihemophilic factor (human) (Grifols)                               | Allergic-type reactions, paresthesia, vision blurred, headache, nausea, abdominal pain, and feeling jittery                                                                                                                                                             |                                                                                                                                                                                                                                                                                                                                                                                            |
| Antihemophilic factor (recombinant) formulated with sucrose (Bayer)   | Inhibitor formation, skin-associated hypersensitivity reactions, infusion site reactions, central venous access device associated infections, pyrexia                                                                                                                   | Dysgeusia                                                                                                                                                                                                                                                                                                                                                                                  |
| Antihemophilic factor (recombinant) (Novo Nordisk)                    | Injection-site reactions, increased hepatic enzymes, and pyrexia                                                                                                                                                                                                        |                                                                                                                                                                                                                                                                                                                                                                                            |
| Antihemophilic factor (recombinant) (Octapharma)                      | Paresthesia, headache, injection-site inflammation, injection-site pain, non-neutralizing anti-factor VIII antibody formation, back pain, vertigo, and dry mouth                                                                                                        | NA                                                                                                                                                                                                                                                                                                                                                                                         |
| Antihemophilic factor (recombinant) (Baxter)                          | Chills, flushing, rash, epistaxis, nausea, fatigue, pyrexia, ear infections, acoustic stimulation tests abnormal, pain in extremity, dizziness, tremors, pharyngolaryngeal pain, hyperhidrosis, pruritus, epistaxis, hematoma, hypotension, pallor, peripheral coldness | Factor VIII inhibition, tachycardia, cyanosis, vomiting, abdominal pain, malaise, injection-site reactions, chest pain, chest discomfort, anaphylactic reaction, hypersensitivity, loss of consciousness, headache, paresthesia, dyspnea, cough, laryngeal edema, angioedema, urticaria, erythema                                                                                          |
| Antihemophilic factor (recombinant) (Pfizer)                          | Headache, arthralgia, pyrexia, inhibitor development, cough, vomiting, diarrhea, asthenia, nausea                                                                                                                                                                       | Anaphylaxis, Inadequate therapeutic response                                                                                                                                                                                                                                                                                                                                               |
| <b>Factor IX Therapies</b>                                            |                                                                                                                                                                                                                                                                         |                                                                                                                                                                                                                                                                                                                                                                                            |

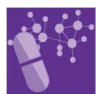

|                                                                            |                                                                                                                                                                                                   |                                                                                                                                                                                                        |
|----------------------------------------------------------------------------|---------------------------------------------------------------------------------------------------------------------------------------------------------------------------------------------------|--------------------------------------------------------------------------------------------------------------------------------------------------------------------------------------------------------|
| Coagulation factor IX (human) (Grifols)                                    | Allergic reactions, mild chills, nausea or stinging at the infusion site, thrombosis or disseminated intravascular coagulation                                                                    | NA                                                                                                                                                                                                     |
| von Willebrand Factor/coagulation factor VIII complex (human) (Octapharma) | Hypersensitivity reactions, urticaria, and dizziness                                                                                                                                              | Dyspnea, nausea, vomiting, rash, headache, tachycardia, flushing, hypotension, chills, cough, chest discomfort, abdominal pain, pyrexia, factor VIII inhibition, anaphylactic reaction and paresthesia |
| Coagulation factor IX (Recombinant) (Pfizer)                               | Nausea, injection-site reaction and pain, headache, dizziness, rash, systemic hypersensitivity reactions                                                                                          | Inadequate factor IX recovery, inadequate therapeutic response, inhibitor development, anaphylaxis, angioedema, dyspnea, hypotension, and thrombosis. DVT and peripheral thrombophlebitis reported     |
| Nonacog beta pegol (Novo Nordisk)                                          | Hypersensitivity, anaphylaxis, inhibitors, palpitations, nausea, pruritus, fatigue, hot flush, injection-site reactions                                                                           | NA                                                                                                                                                                                                     |
| Coagulation factor IX (human) (CSL Behring)                                | Headache, fever, chills, flushing, nausea, vomiting, tingling, lethargy, hives, stinging or burning at the infusion site or manifestations of allergic reactions. Some experienced ALT elevations | Anaphylaxis, angioedema, cyanosis, dyspnea, hypotension, thrombosis, inadequate therapeutic response, and inhibitor development                                                                        |
| Coagulation factor IX (recombinant), albumin fusion protein (CSL Behring)  | Headache, dizziness, hypersensitivity, rash, eczema                                                                                                                                               | NA                                                                                                                                                                                                     |

The AEs were sourced from the prescribing information (PI) for each therapy and represent the most common and less common AEs observed during clinical trials. “Post-marketing AEs” are AEs listed in the PI as such.



Supplemental Table S2. Other Therapy Adverse Events

| Drug                                                                     | Most Common Adverse Events                                                                                                                                                                                                                                                                                                                                                                                                                                                                                                                                                                                                                                                                                                                                                                                                                                                                                                                                                                    | Post-marketing Reported Adverse Events                                                                                                                                                                                                                                                                                                                                                                                                                                                                                                                                                                                                                                                                                                                                                                                                        |
|--------------------------------------------------------------------------|-----------------------------------------------------------------------------------------------------------------------------------------------------------------------------------------------------------------------------------------------------------------------------------------------------------------------------------------------------------------------------------------------------------------------------------------------------------------------------------------------------------------------------------------------------------------------------------------------------------------------------------------------------------------------------------------------------------------------------------------------------------------------------------------------------------------------------------------------------------------------------------------------------------------------------------------------------------------------------------------------|-----------------------------------------------------------------------------------------------------------------------------------------------------------------------------------------------------------------------------------------------------------------------------------------------------------------------------------------------------------------------------------------------------------------------------------------------------------------------------------------------------------------------------------------------------------------------------------------------------------------------------------------------------------------------------------------------------------------------------------------------------------------------------------------------------------------------------------------------|
| Immune globulin intravenous (human) solvent detergent treated (Shire)    | Headache, nausea, chills, fatigue, pyrexia, upper abdominal pain, diarrhea, back pain, infusion site pain, hyperhidrosis and flushing. Aseptic meningitis syndrome, anemia, hemolysis, lymphadenopathy, thrombocytopenia, anaphylactic shock, anaphylactic/anaphylactoid reaction, hypersensitivity, restlessness, cerebrovascular accident, transient ischemic attack, convulsion, dizziness, migraine, paresthesia, syncope, tremor, retinal vein thrombosis, eye pain, photophobia, visual disturbance, myocardial infarction, cyanosis, tachycardia, bradycardia, vena cava thrombosis, arterial thrombosis, deep vein thrombosis, hypotension, hypertension, pallor, thrombophlebitis, pulmonary embolism, pulmonary edema, bronchospasm, wheezing, cough, hyperventilation, hypoxia, throat tightness, abdominal pain, dyspepsia, hepatitis, angioedema, dermatitis, erythema, rash, arthralgia, myalgia, infusion site reaction, asthenia, edema, rigors, positive direct coombs Test. | Renal failure, thrombotic events, anaphylactic shock, aseptic meningitis and hemolysis                                                                                                                                                                                                                                                                                                                                                                                                                                                                                                                                                                                                                                                                                                                                                        |
| Immune globulin intravenous [human], 5% liquid (Bio Products Laboratory) | Headache, pyrexia, nasal congestion/edema, fatigue, nausea, hypertension, rash, hypotension, infusion site reaction, vomiting, myalgia, chills, tachycardia, chest pain/discomfort, pain, dizziness, malaise, dysuria, and dry skin, pruritus, dehydration, and arthralgia. Abdominal pain upper, gastritis, contusion, arthralgia, cough, anemia, ecchymosis, pruritus, dehydration, hypertension, neck pain, sinusitis, rhinitis, vertigo, asthenia, cystitis, UTI, eczema, bronchitis                                                                                                                                                                                                                                                                                                                                                                                                                                                                                                      | Dizziness, pulmonary embolism, dyspnea, respiratory distress, myocardial infarction, other thromboembolic event, migraine, aseptic meningitis, rash, urticarial, musculoskeletal pain                                                                                                                                                                                                                                                                                                                                                                                                                                                                                                                                                                                                                                                         |
| Human normal immunoglobulin (Grifols)                                    | Headache, pyrexia/fever, pain, infusion site reactions, diarrhea, rigors or chills, urticaria, hypotension, tachycardia, nausea, abdominal pain, and vomiting. Hypertension, sinusitis, positive Coombs test, arthralgia, myalgia, dizziness, bronchitis, and hypotension                                                                                                                                                                                                                                                                                                                                                                                                                                                                                                                                                                                                                                                                                                                     | Hypersensitivity, headache, diarrhea, tachycardia, fever, fatigue, dizziness, malaise, chills, flushing, urticaria or other skin reactions, wheezing or other chest discomfort, nausea, vomiting, rigors, back pain, myalgia, arthralgia, and changes in blood pressure, acute renal dysfunction/failure, osmotic nephropathy, apnea, acute respiratory distress syndrome, transfusion-related acute lung injury, cyanosis, hypoxemia, pulmonary edema, dyspnea, bronchospasm, Cardiac arrest, thromboembolism, vascular collapse, hypotension, Coma, loss of consciousness, seizures, tremor, aseptic meningitis syndrome, Stevens-Johnson syndrome, epidermolysis, erythema multiforme, dermatitis, pancytopenia, leukopenia, hemolysis, positive direct antiglobulin test, back pain, hepatic dysfunction, abdominal pain, pyrexia, rigors |

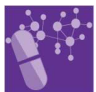

|                                             |                                                                                                                                                                                                                                                                                                                                                                                                                                                                                                                                                                                                                                                                                                                                                                                                                                                                                                                                                                                                                                                                                                                                                                                                                                                                                                                                                                                                                                                                                                                                                                                                                                                                                                                                                                                                                                                                                                                                                                                                                                                                                                                                                                                                                                                                                                                                                                                                                                                                                                  |    |
|---------------------------------------------|--------------------------------------------------------------------------------------------------------------------------------------------------------------------------------------------------------------------------------------------------------------------------------------------------------------------------------------------------------------------------------------------------------------------------------------------------------------------------------------------------------------------------------------------------------------------------------------------------------------------------------------------------------------------------------------------------------------------------------------------------------------------------------------------------------------------------------------------------------------------------------------------------------------------------------------------------------------------------------------------------------------------------------------------------------------------------------------------------------------------------------------------------------------------------------------------------------------------------------------------------------------------------------------------------------------------------------------------------------------------------------------------------------------------------------------------------------------------------------------------------------------------------------------------------------------------------------------------------------------------------------------------------------------------------------------------------------------------------------------------------------------------------------------------------------------------------------------------------------------------------------------------------------------------------------------------------------------------------------------------------------------------------------------------------------------------------------------------------------------------------------------------------------------------------------------------------------------------------------------------------------------------------------------------------------------------------------------------------------------------------------------------------------------------------------------------------------------------------------------------------|----|
| Triamcinolone<br>Diacetate, USP<br>(Sandoz) | Allergic or hypersensitivity reactions, anaphylactoid reactions, anaphylaxis, angioedema. Bradycardia, cardiac arrest, cardiac arrhythmias, cardiac enlargement, circulatory collapse, congestive heart failure, fat embolism, hypertension, hypertrophic cardiomyopathy in premature infants, myocardial rupture following recent myocardial infarction, pulmonary edema, syncope, tachycardia, thromboembolism, thrombophlebitis, vasculitis. Acne, allergic dermatitis, cutaneous and subcutaneous atrophy, dry scaly skin, ecchymoses and petechiae, edema, erythema, hyperpigmentation, hypopigmentation, impaired wound healing, increased sweating, rash, sterile abscess, striae, suppressed reactions to skin tests, thin fragile skin, thinning scalp hair, urticaria. Decreased carbohydrate and glucose tolerance, development of cushingoid state, glycosuria, hirsutism, hypertrichosis, increased requirements for insulin or oral hypoglycemic agents in diabetes, manifestations of latent diabetes mellitus, menstrual irregularities, secondary adrenocortical and pituitary unresponsiveness, suppression of growth in pediatric patients. Congestive heart failure, fluid retention, hypokalemic alkalosis, potassium loss, sodium retention. Abdominal distention, increased appetite, nausea, pancreatitis, peptic ulcer with possible perforation and hemorrhage, perforation of the small and large intestine, ulcerative esophagitis. Negative nitrogen balance due to protein catabolism. Aseptic necrosis of femoral and humeral heads, calcinosis, Charcot-like arthropathy, loss of muscle mass, muscle weakness, osteoporosis, pathologic fracture of long bones, postinjection flare, steroid myopathy, tendon rupture, vertebral compression fractures. Convulsions, depression, emotional instability, euphoria, headache, increased intracranial pressure with papilledema, insomnia, mood swings, neuritis, neuropathy, paresthesia, personality changes, psychic disorders, vertigo. Arachnoiditis, meningitis, paraparesis/paraplegia, and sensory disturbances. Exophthalmos, glaucoma, increased intraocular pressure, posterior subcapsular cataracts, rare instances of blindness associated with periocular injections. Abnormal fat deposits, decreased resistance to infection, hiccups, increased or decreased motility and number of spermatozoa, injection-site infections following non-sterile administration, malaise, moon face, weight gain | NA |
| Pegaspargase (Shire)                        | Allergic reactions (including anaphylaxis), central nervous system (CNS) thrombosis, coagulopathy, elevated transaminases, hyperbilirubinemia, hyperglycemia, and pancreatitis                                                                                                                                                                                                                                                                                                                                                                                                                                                                                                                                                                                                                                                                                                                                                                                                                                                                                                                                                                                                                                                                                                                                                                                                                                                                                                                                                                                                                                                                                                                                                                                                                                                                                                                                                                                                                                                                                                                                                                                                                                                                                                                                                                                                                                                                                                                   | NA |

The AEs were sourced from the PI for each therapy and represent the most common and less common AEs observed during clinical trials. “Post-marketing AEs” are AEs listed in the PI as such.
